# Supplementary material for: Cyclin D1 expression predicts postoperative distant metastasis and survival in resectable esophageal squamous cell carcinoma
Source: PubMed Central journal article supplement (PMC5058741; doi:10.18632/oncotarget.9078), 2016-04-28
Supplement: oncotarget-07-31088-s001.pdf [file oncotarget-07-31088-s001.pdf]

## Cyclin D1 expression predicts postoperative distant metastasis and survival in resectable esophageal squamous cell carcinoma

### Supplementary Materials

Supplementary Table S1: Cyclin D1 expression and clinicopathologic variables

| Variables                  | Training Cohort |      |                    | Validation Cohort |      |                    |
|----------------------------|-----------------|------|--------------------|-------------------|------|--------------------|
|                            | Low             | High | <i>p</i>           | Low               | High | <i>p</i>           |
| Sex                        |                 |      |                    |                   |      |                    |
| Male                       | 139             | 101  | 0.729              | 58                | 49   | 0.982              |
| Female                     | 44              | 35   |                    | 31                | 26   |                    |
| Age                        |                 |      |                    |                   |      |                    |
| ≤ 60                       | 123             | 83   | 0.253              | 72                | 46   | < 0.01             |
| > 60                       | 60              | 53   |                    | 17                | 29   |                    |
| Cell differentiation       |                 |      |                    |                   |      |                    |
| Well                       | 53              | 28   | 0.059              | 16                | 10   | 0.355              |
| Moderate                   | 96              | 69   |                    | 60                | 48   |                    |
| Poor                       | 34              | 39   |                    | 13                | 17   |                    |
| Pathological T category    |                 |      |                    |                   |      |                    |
| T1                         | 18              | 11   | 0.811 <sup>a</sup> | 4                 | 5    | 0.893 <sup>a</sup> |
| T2                         | 68              | 45   |                    | 5                 | 4    |                    |
| T3                         | 96              | 79   |                    | 77                | 62   |                    |
| T4                         | 1               | 1    |                    | 3                 | 4    |                    |
| Pathological N category    |                 |      |                    |                   |      |                    |
| N0                         | 129             | 88   | 0.623 <sup>a</sup> | 65                | 55   | 0.762 <sup>a</sup> |
| N1                         | 39              | 32   |                    | 16                | 10   |                    |
| N2                         | 13              | 13   |                    | 6                 | 8    |                    |
| N3                         | 2               | 3    |                    | 2                 | 2    |                    |
| AJCC stage                 |                 |      |                    |                   |      |                    |
| I                          | 70              | 40   | 0.259              | 8                 | 7    | 0.926              |
| II                         | 70              | 60   |                    | 56                | 45   |                    |
| III                        | 43              | 36   |                    | 25                | 23   |                    |
| Risk of distant metastasis |                 |      |                    |                   |      |                    |
| Low                        | 141             | 84   | < 0.01             | 57                | 31   | < 0.01             |
| High                       | 42              | 52   |                    | 32                | 44   |                    |

AJCC: American Joint Committee on Cancer; <sup>a</sup>Fisher's exact test.

**Supplementary Table S2: Logistic regression model of pooled dataset ( $n = 483$ ; dependent variable = distant metastasis in five years after surgery)**

| Characteristics                     | OR    | 95% CI for OR |       | <i>p</i> |
|-------------------------------------|-------|---------------|-------|----------|
|                                     |       | Lower         | Upper |          |
| Gender (female vs male)             | 0.507 | 0.302         | 0.851 | 0.010    |
| Age (> 60 years vs ≤ 60 years)      | 1.427 | 0.889         | 2.292 | 0.141    |
| Tumor location                      | 0.928 | 0.675         | 1.276 | 0.646    |
| Tumor length (> 2.5 cm vs ≤ 2.5 cm) | 3.459 | 1.586         | 7.543 | < 0.01   |
| Cell differentiation                | 2.362 | 1.654         | 3.374 | < 0.01   |
| AJCC stage                          | 3.392 | 2.397         | 4.799 | < 0.01   |
| Cyclin D1 (High level vs Low level) | 2.219 | 1.421         | 3.466 | < 0.01   |

OR: odds ratio; CI: confidence interval; AJCC: American Joint Committee on Cancer.

**Supplementary Table S3: Prognostic factors for OS by multivariate Cox regression analysis for both cohorts of patients**

| Prognostic Variables                 | Training Cohort ( $n = 319$ ) |               |       |          | Validation Cohort ( $n = 164$ ) |               |        |          |
|--------------------------------------|-------------------------------|---------------|-------|----------|---------------------------------|---------------|--------|----------|
|                                      | HR                            | 95% CI for HR |       | <i>p</i> | HR                              | 95% CI for HR |        | <i>p</i> |
|                                      |                               | Lower         | Upper |          |                                 | Lower         | Upper  |          |
| Gender (female vs. male)             | 0.508                         | 0.282         | 0.914 | 0.024    | 0.890                           | 0.369         | 2.142  | 0.794    |
| Age (> 60 years vs. ≤ 60 years)      | 1.537                         | 1.007         | 2.346 | 0.046    | 1.574                           | 0.630         | 3.932  | 0.332    |
| Tumor location                       | 0.991                         | 0.731         | 1.342 | 0.952    | 1.010                           | 0.575         | 1.772  | 0.973    |
| Tumor length (> 2.5 cm vs. ≤ 2.5 cm) | 1.837                         | 0.832         | 4.060 | 0.133    | 2.635                           | 0.607         | 11.439 | 0.196    |
| Cell differentiation                 | 1.933                         | 1.405         | 2.660 | < 0.01   | 0.810                           | 0.362         | 1.809  | 0.606    |
| AJCC stage                           | 2.041                         | 1.515         | 2.749 | < 0.01   | 3.307                           | 1.522         | 7.185  | < 0.01   |
| Cyclin D1 (High level vs. Low level) | 1.864                         | 1.213         | 2.862 | < 0.01   | 1.250                           | 0.566         | 2.758  | 0.581    |

OS: overall survival; CI: confidence interval; HR: hazard ratio; AJCC: the American Joint Committee on Cancer.

**Supplementary Table S4: Prognostic factors for DMFS by multivariate Cox regression analysis for both cohorts of patients**

| Prognostic Variables                 | Training Cohort ( <i>n</i> = 319) |               |       |          | Validation Cohort ( <i>n</i> = 164) |               |        |          |
|--------------------------------------|-----------------------------------|---------------|-------|----------|-------------------------------------|---------------|--------|----------|
|                                      | HR                                | 95% CI for HR |       | <i>p</i> | HR                                  | 95% CI for HR |        | <i>p</i> |
|                                      |                                   | Lower         | Upper |          |                                     | Lower         | Upper  |          |
| Gender (female vs. male)             | 0.459                             | 0.256         | 0.825 | < 0.01   | 0.876                               | 0.536         | 1.431  | 0.597    |
| Age (> 60 years vs. ≤ 60 years)      | 1.405                             | 0.937         | 2.108 | 0.100    | 1.077                               | 0.634         | 1.829  | 0.783    |
| Tumor location                       | 0.946                             | 0.707         | 1.267 | 0.712    | 1.014                               | 0.739         | 1.393  | 0.929    |
| Tumor length (> 2.5 cm vs. ≤ 2.5 cm) | 1.707                             | 0.810         | 3.600 | 0.160    | 7.616                               | 1.851         | 31.331 | < 0.01   |
| Cell differentiation                 | 1.790                             | 1.326         | 2.418 | < 0.01   | 1.646                               | 1.084         | 2.498  | 0.019    |
| AJCC stage                           | 2.172                             | 1.629         | 2.897 | < 0.01   | 2.651                               | 1.694         | 4.149  | < 0.01   |
| Cyclin D1 (High level vs. Low level) | 1.608                             | 1.071         | 2.415 | 0.022    | 1.795                               | 1.139         | 2.828  | 0.012    |

DMFS: distant metastasis-free survival; CI: confidence interval; HR: hazard ratio; AJCC: the American Joint Committee on Cancer.
